# Supplementary material for: Identification of a gene expression signature of vascular invasion and recurrence in stage I lung adenocarcinoma via bulk and spatial transcriptomics
Source: PubMed Central journal article supplement (PMC11195124; doi:10.1101/2024.06.07.597993), 2024-06-10
Supplement: media-2.pdf [file media-2.pdf]

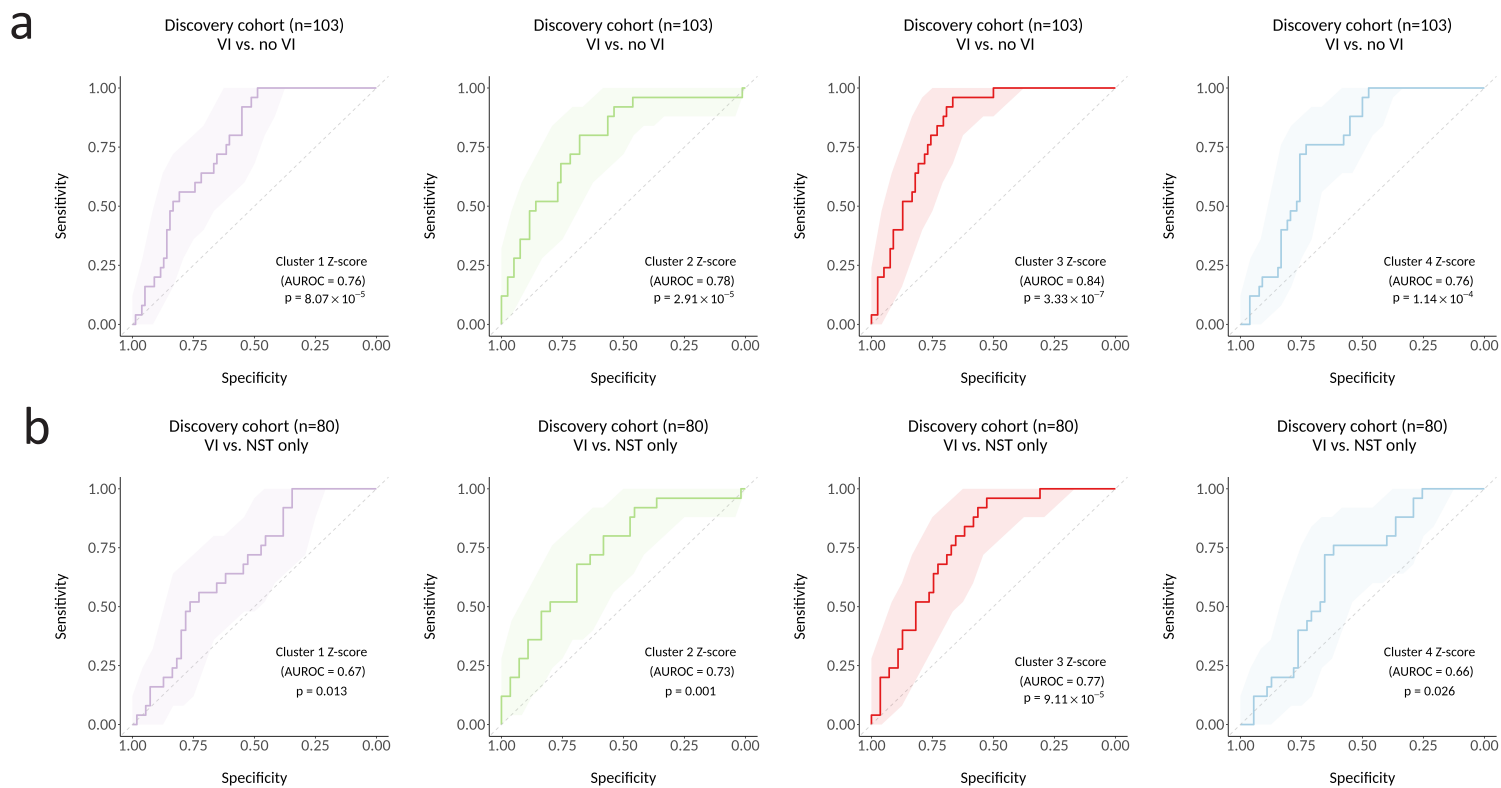

**Extended Data Fig. 2. The four VI gene expression clusters individually predict VI in the discovery cohort even in the absence of LMP tumors.**
