# Supplementary material for: Identification of a gene expression signature of vascular invasion and recurrence in stage I lung adenocarcinoma via bulk and spatial transcriptomics
Source: PubMed Central journal article supplement (PMC11195124; doi:10.1101/2024.06.07.597993), 2024-06-10
Supplement: media-3.pdf [file media-3.pdf]

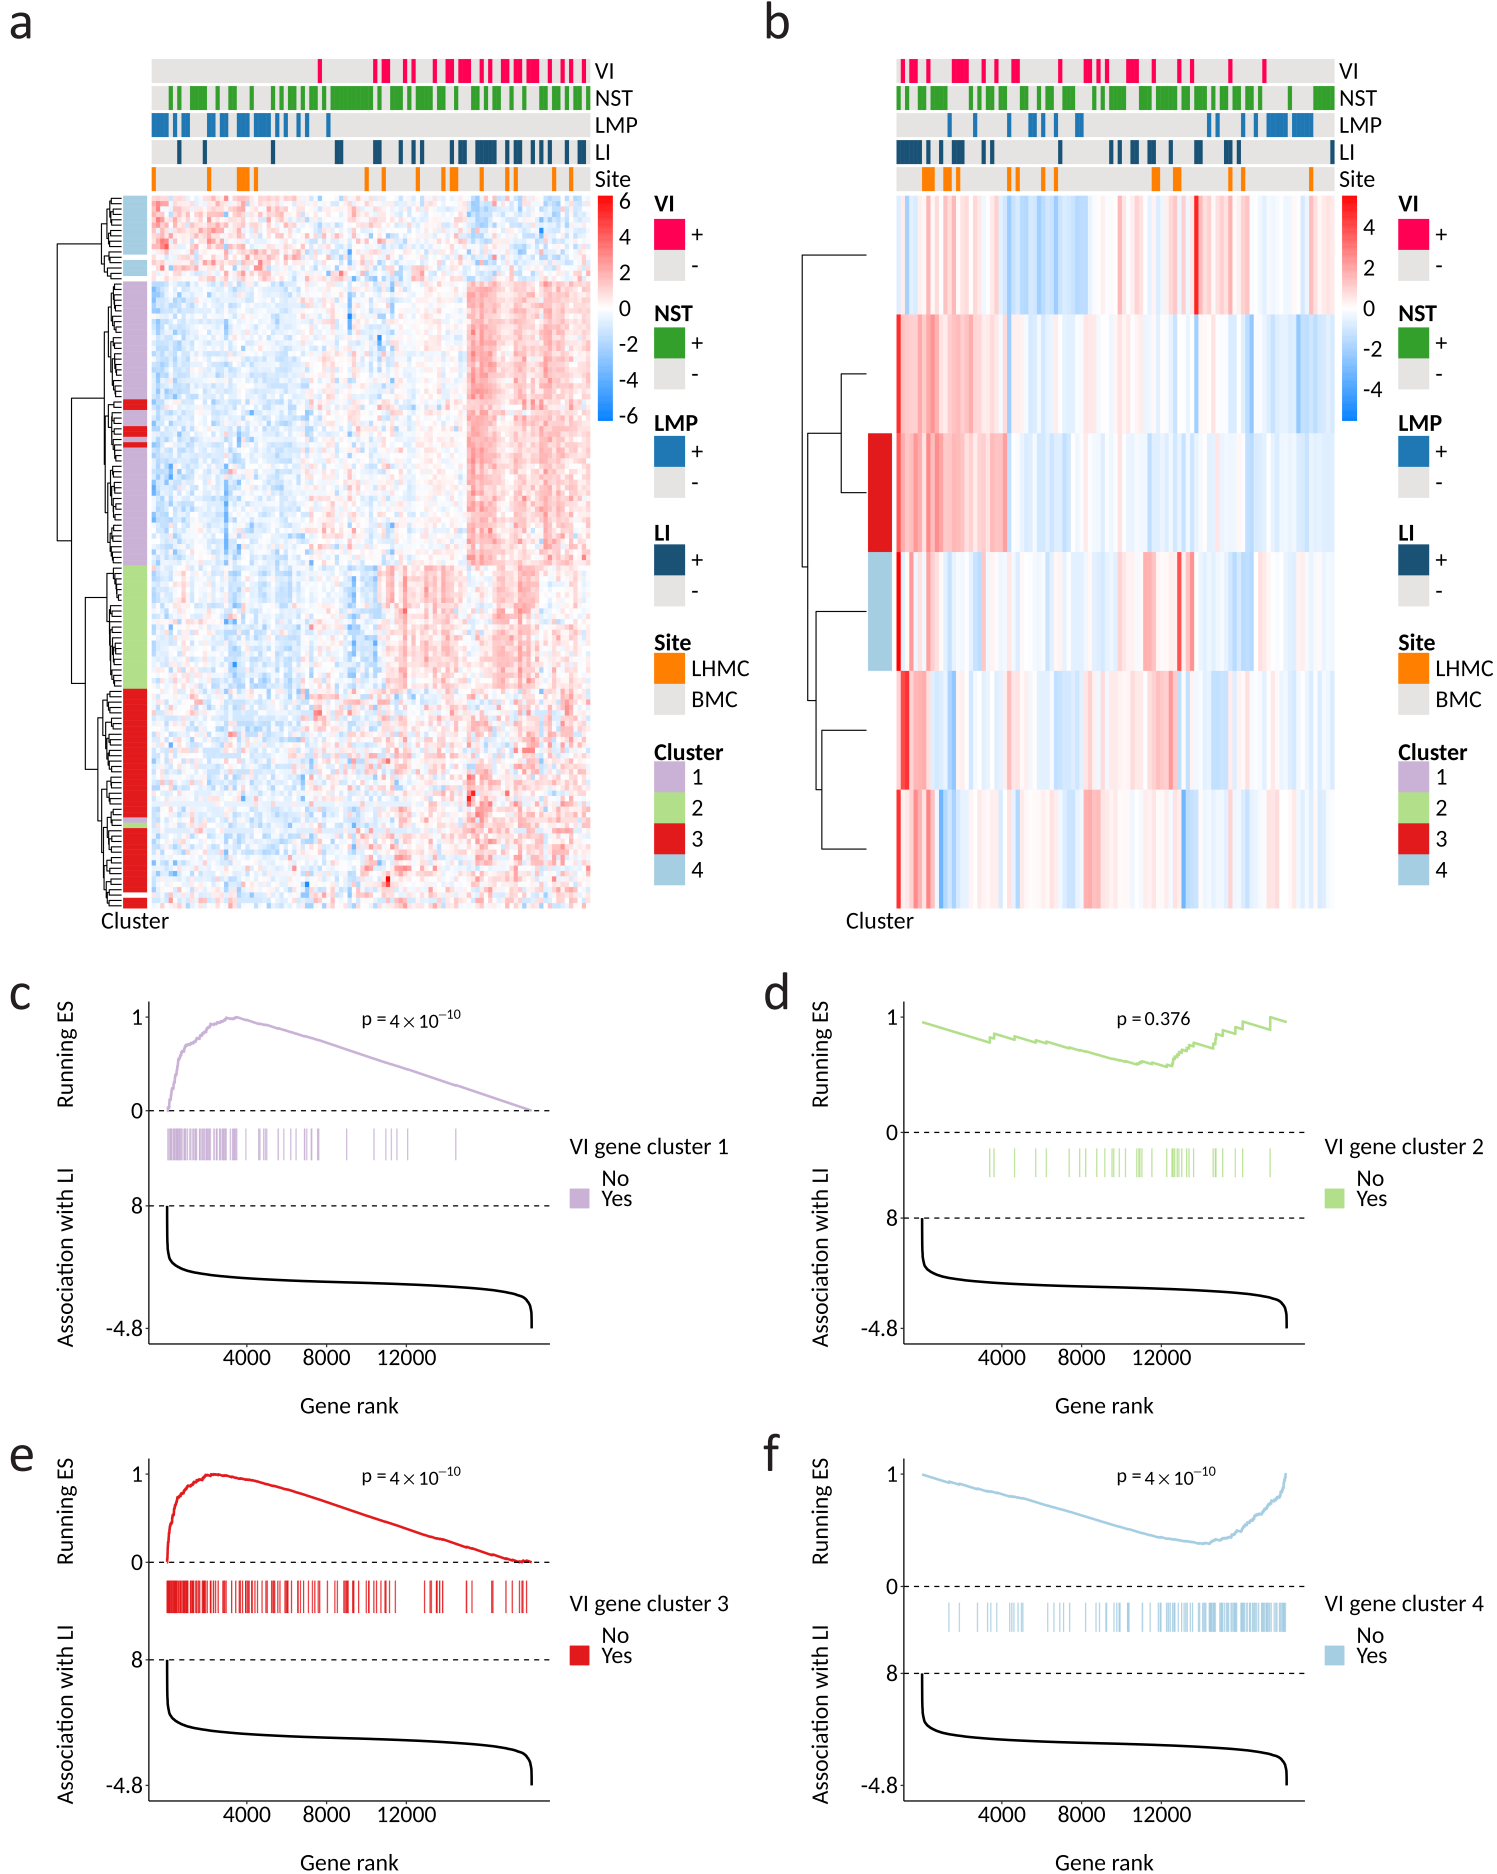

**Extended Data Fig. 3. VI but not LI is associated with expression of tissue remodeling genes.**
