# Supplementary material for: Identification of a gene expression signature of vascular invasion and recurrence in stage I lung adenocarcinoma via bulk and spatial transcriptomics
Source: PubMed Central journal article supplement (PMC11195124; doi:10.1101/2024.06.07.597993), 2024-06-10
Supplement: media-5.pdf [file media-5.pdf]

a

Sample 10

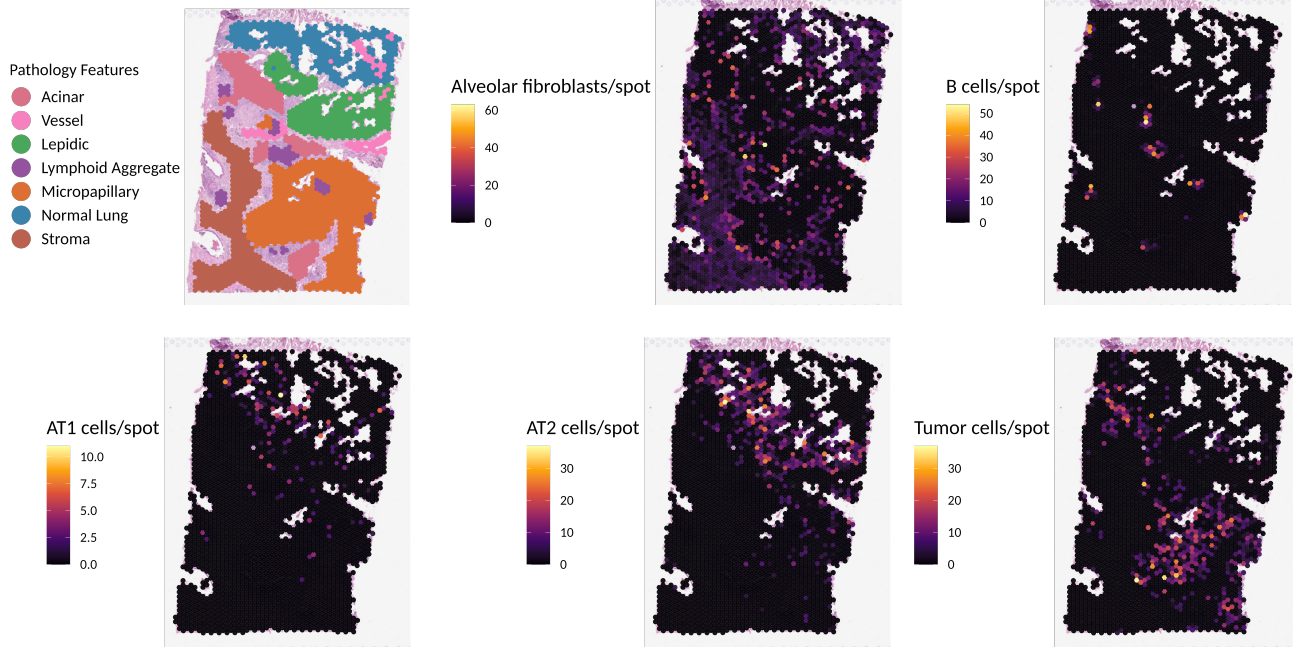

b

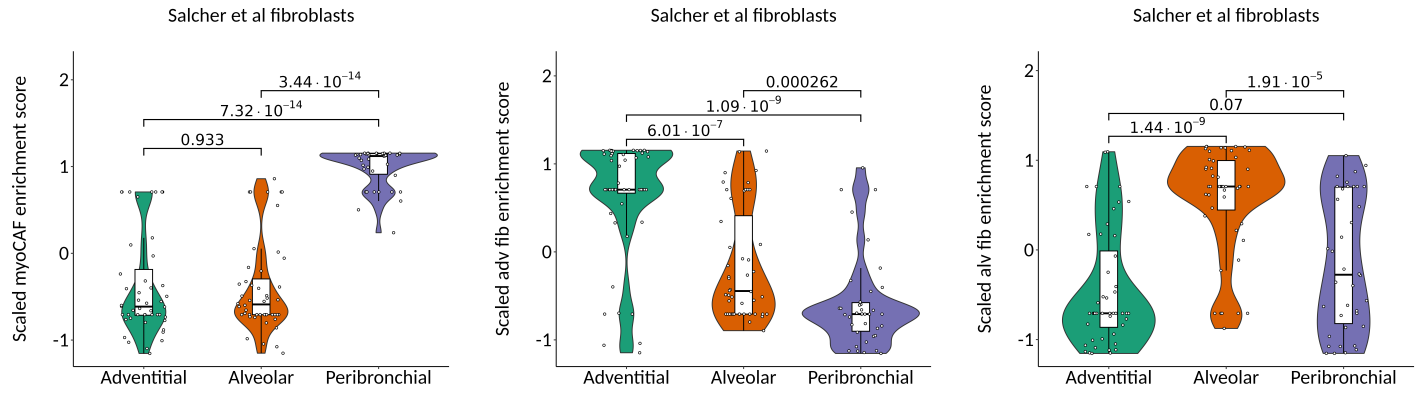

c

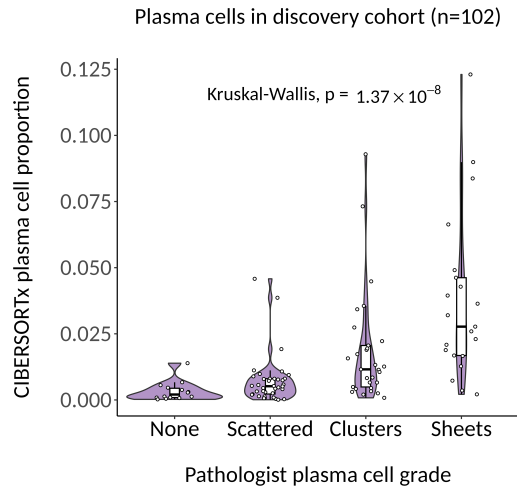

d

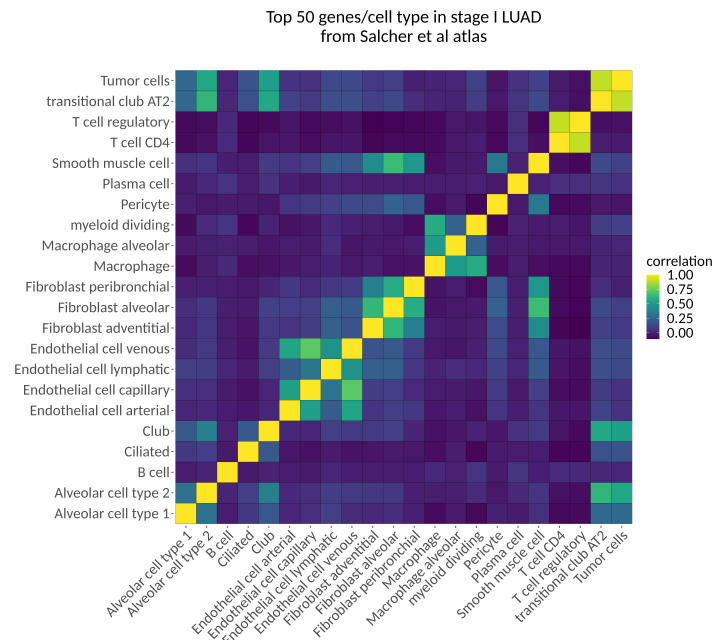

Extended Data Fig. 5. Cell type deconvolution of stRNA-seq and bulk RNA-seq.
