# Supplementary material for: Identification of a gene expression signature of vascular invasion and recurrence in stage I lung adenocarcinoma via bulk and spatial transcriptomics
Source: PubMed Central journal article supplement (PMC11195124; doi:10.1101/2024.06.07.597993), 2024-06-10
Supplement: NIHPP2024.06.07.597993v1-supplement-7.pdf [file NIHPP2024.06.07.597993v1-supplement-7.pdf]

## Supplementary Tables

**Table S1. Clinical characteristics of resected stage I LUAD tumors with RNA-seq (post-QC) from the discovery cohort (n=103 tumors) using the novel histopathology classification.**

|                                       | <b>LMP</b>    | <b>NST</b>    | <b>VI</b>     | <b>p value</b> |
|---------------------------------------|---------------|---------------|---------------|----------------|
| <b>n</b>                              | 23            | 55            | 25            |                |
| <b>Age (mean (SD))</b>                | 67.76 (11.39) | 65.73 (10.11) | 66.23 (7.92)  | 0.715          |
| <b>Gender (%)</b>                     |               |               |               | 0.099          |
| Female                                | 15 (65.2)     | 40 (72.7)     | 12 (48.0)     |                |
| Male                                  | 8 (34.8)      | 15 (27.3)     | 13 (52.0)     |                |
| <b>Race (%)</b>                       |               |               |               | 0.177          |
| Asian                                 | 2 ( 8.7)      | 2 ( 3.6)      | 1 ( 4.0)      |                |
| Black / African American              | 2 ( 8.7)      | 11 (20.0)     | 7 (28.0)      |                |
| Hispanic / Latino                     | 2 ( 8.7)      | 0 ( 0.0)      | 0 ( 0.0)      |                |
| Unknown                               | 0 ( 0.0)      | 1 ( 1.8)      | 1 ( 4.0)      |                |
| White                                 | 17 (73.9)     | 41 (74.5)     | 16 (64.0)     |                |
| <b>Pack years (mean (SD))</b>         | 35.50 (36.81) | 43.77 (34.45) | 36.37 (20.05) | 0.494          |
| <b>Smoking status (%)</b>             |               |               |               | 0.221          |
| Current                               | 4 (17.4)      | 18 (32.7)     | 12 (48.0)     |                |
| Former                                | 13 (56.5)     | 30 (54.5)     | 11 (44.0)     |                |
| Never                                 | 6 (26.1)      | 6 (10.9)      | 2 ( 8.0)      |                |
| Unknown                               | 0 ( 0.0)      | 1 ( 1.8)      | 0 ( 0.0)      |                |
| <b>Total size (cm) (mean (SD))</b>    | 1.34 (0.43)   | 1.75 (0.75)   | 2.00 (0.70)   | 0.005          |
| <b>Invasive size (cm) (mean (SD))</b> | 0.63 (0.46)   | 1.28 (0.60)   | 1.63 (0.57)   | <0.001         |
| <b>% Lepidic (mean (SD))</b>          | 63.48 (25.91) | 25.27 (27.48) | 16.60 (20.55) | <0.001         |
| <b>% Acinar (mean (SD))</b>           | 23.48 (22.69) | 26.45 (23.47) | 36.00 (28.72) | 0.169          |
| <b>% Papillary (mean (SD))</b>        | 12.83 (24.90) | 16.09 (23.23) | 8.40 (9.76)   | 0.323          |
| <b>% Solid (mean (SD))</b>            | 0.00 (0.00)   | 15.45 (30.60) | 21.60 (32.04) | 0.021          |
| <b>% Micropapillary (mean (SD))</b>   | 0.00 (0.00)   | 6.00 (13.69)  | 8.60 (17.11)  | 0.068          |
| <b>% Cribriform (mean (SD))</b>       | 0.22 (1.04)   | 10.55 (20.22) | 8.80 (13.01)  | 0.038          |
| <b>LI</b>                             | 0 (0.0)       | 14 (25.5)     | 13 (52.0)     | <0.001         |
| <b>VPI</b>                            | 0 (0.0)       | 11 (20.0)     | 13 (52.0)     | <0.001         |

|                        |           |           |           |        |
|------------------------|-----------|-----------|-----------|--------|
| <b>STAS</b>            | 0 (0.0)   | 28 (50.9) | 12 (48.0) | <0.001 |
| <b>Institution (%)</b> |           |           |           | 0.093  |
| LHMC                   | 6 (26.1)  | 5 (9.1)   | 6 (24.0)  |        |
| BMC                    | 17 (73.9) | 50 (90.9) | 19 (76.0) |        |
| <b>Procedure (%)</b>   |           |           |           | 0.23   |
| Lobe                   | 9 (39.1)  | 35 (63.6) | 12 (48.0) |        |
| Segment                | 2 (8.7)   | 1 (1.8)   | 2 (8.0)   |        |
| Wedge                  | 12 (52.2) | 19 (34.5) | 11 (44.0) |        |

Note: The data are shown as the number and (%) unless otherwise indicated. Abbreviations: LMP, low malignant potential; NST, no special type; VI, vascular invasion; LI, lymphatic invasion; VPI, visceral pleural invasion; STAS, spread through air spaces; LHMC, Lahey Hospital and Medical Center; BMC, Boston Medical Center.

**Table S2. Clinical characteristics of resected early-stage LUAD tumors with stRNA-seq (post-QC) from the discovery cohort (n=15 samples).**

| Sample ID | Batch | 8th Stage | Novel Grade | Age | Sex | Smoking Status | RNA-seq | VI (Capture Frame) |
|-----------|-------|-----------|-------------|-----|-----|----------------|---------|--------------------|
| 1A        | 1     | IB        | VI          | 68  | M   | Former         | Yes     | 1                  |
| 1B        | 2     | IB        | VI          | 68  | M   | Former         | Yes     | 0                  |
| 2B        | 2     | IA3       | VI          | 68  | F   | Current        | Yes     | 0                  |
| 2A        | 2     | IA3       | VI          | 68  | F   | Current        | Yes     | 0                  |
| 3         | 2     | IA1       | NST         | 71  | M   | Former         | Yes     | 0                  |
| 4         | 2     | IB        | VI          | 66  | M   | Former         | Yes     | 1                  |
| 5         | 2     | IA1       | NST         | 72  | M   | Former         | Yes     | 0                  |
| 7         | 2     | IA1       | LMP         | 52  | F   | Current        | Yes     | 0                  |
| 8         | 1     | IB        | VI          | 66  | M   | Former         | Yes     | 0                  |
| 9         | 2     | IA2       | VI          | 63  | F   | Current        | Yes     | 1                  |
| 10        | 2     | IA2       | NST         | 69  | M   | Former         | Yes     | 0                  |
| 11        | 1     | IIA       | NST         | 63  | F   | Former         | Yes     | 0                  |
| 12        | 2     | IB        | NST         | 65  | F   | Former         | Yes     | 0                  |
| 13        | 1     | IA1       | NST         | 72  | F   | Former         | Yes     | 0                  |
| 14        | 2     | IA2       | NST         | 75  | F   | Former         | Yes     | 0                  |

Note: Abbreviations: LMP, low malignant potential; NST, no special type; VI, vascular invasion; LI, lymphatic invasion; VPI, visceral pleural invasion; STAS, spread through air spaces; LHMC, Lahey Hospital and Medical Center; BMC, Boston Medical Center.

**Table S3. Clinical characteristics of resected stage I LUAD tumors with RNA-seq (post-QC) from the validation cohort (n=60 tumors) using the novel histopathology classification.**

|                        | LMP          | NST          | VI           | p value |
|------------------------|--------------|--------------|--------------|---------|
| <b>n</b>               | 7            | 36           | 17           |         |
| <b>Age (mean (SD))</b> | 65.57 (8.50) | 66.31 (7.30) | 61.76 (6.44) | 0.107   |

|                                       |               |               |               |        |
|---------------------------------------|---------------|---------------|---------------|--------|
| <b>Gender (%)</b>                     |               |               |               | 0.205  |
| Female                                | 6 (85.7)      | 19 (52.8)     | 8 (47.1)      |        |
| Male                                  | 1 ( 14.3)     | 17 ( 47.2)    | 9 ( 52.9)     |        |
| <b>Pack years (mean (SD))</b>         | 31.43 (11.80) | 49.53 (25.19) | 51.65 (17.91) | 0.114  |
| <b>Smoking status (%)</b>             |               |               |               | 0.408  |
| Current                               | 2 (28.6)      | 13 (36.1)     | 9 (52.9)      |        |
| Former                                | 5 ( 71.4)     | 23 ( 63.9)    | 8 ( 47.1)     |        |
| <b>Total size (cm) (mean (SD))</b>    | 1.90 (0.76)   | 1.93 (0.87)   | 2.22 (0.90)   | 0.484  |
| <b>Invasive size (cm) (mean (SD))</b> | 0.81 (0.38)   | 1.68 (0.95)   | 2.06 (0.84)   | 0.01   |
| <b>% Lepidic (mean (SD))</b>          | 55.71 (22.25) | 22.78 (29.46) | 9.12 (14.71)  | 0.001  |
| <b>% Acinar (mean (SD))</b>           | 26.43 (22.12) | 29.31 (26.68) | 20.29 (24.46) | 0.494  |
| <b>% Papillary (mean (SD))</b>        | 17.86 (30.80) | 19.44 (28.63) | 8.82 (10.97)  | 0.361  |
| <b>% Solid (mean (SD))</b>            | 0.00 (0.00)   | 5.00 (11.46)  | 46.47 (37.03) | <0.001 |
| <b>% Micropapillary (mean (SD))</b>   | 0.00 (0.00)   | 10.28 (20.91) | 4.71 (10.23)  | 0.267  |
| <b>% Cribriform (mean (SD))</b>       | 0.00 (0.00)   | 13.33 (27.67) | 10.59 (20.30) | 0.415  |
| <b>LI (%)</b>                         | 0 (0.0)       | 17 ( 47.2)    | 9 ( 52.9)     | 0.045  |
| <b>VPI (%)</b>                        | 0 (0.0)       | 5 ( 13.9)     | 7 ( 41.2)     | 0.025  |
| <b>STAS (%)</b>                       | 0 (0.0)       | 14 ( 38.9)    | 10 ( 58.8)    | 0.027  |
| <b>Procedure (%)</b>                  |               |               |               | 0.79   |
| Lobe                                  | 6 ( 85.7)     | 27 ( 79.4)    | 14 ( 82.4)    |        |
| Segment                               | 1 ( 14.3)     | 2 ( 5.9)      | 1 ( 5.9)      |        |
| Wedge                                 | 0 ( 0.0)      | 5 ( 14.7)     | 2 ( 11.8)     |        |

Note: Abbreviations: LMP, low malignant potential; NST, no special type; VI, vascular invasion; LI, lymphatic invasion; VPI, visceral pleural invasion; STAS, spread through air spaces; all cases were from Lahey Hospital and Medical Center.
